# Supplementary material for: Electrocatalytic water oxidation over AlFe2B2
Source: Royal Society of Chemistry journal article supplement (doi:10.1039/c8sc04106g), 2019-01-01
Supplement: c8sc04106g1.pdf [file c8sc04106g1.pdf]

# Supporting Information

## Electrocatalytic Water Oxidation over $\text{AlFe}_2\text{B}_2$

Dallas K. Mann,<sup>a,#</sup> Junyuan Xu,<sup>b,#</sup> Natalia E. Mordvinova,<sup>c</sup> Vincent Yannello,<sup>a</sup> Yasmine Ziouani,<sup>b</sup> Noelia González-Ballesteros,<sup>d</sup> Juliana P. S. Sousa,<sup>b</sup> Oleg I. Lebedev,<sup>c</sup> Yury V. Kolen'ko,<sup>b,\*</sup> and Michael Shatruk<sup>a,\*</sup>

<sup>a</sup> Department of Chemistry and Biochemistry, Florida State University, 95 Chieftan Way, Tallahassee, FL 32306, USA

<sup>b</sup> International Iberian Nanotechnology Laboratory, Braga 4715-330, Portugal

<sup>c</sup> Laboratoire CRISMAT, UMR 6508, CNRS-Ensicaen, Caen 14050, France

<sup>d</sup> Inorganic Chemistry Department, Biomedical Research Centre (CINBIO), Universidade de Vigo, Vigo 36210, Spain

E-mail: [shatruk@chem.fsu.edu](mailto:shatruk@chem.fsu.edu); [yury.kolenko@inl.int](mailto:yury.kolenko@inl.int)

| Contents                                                                                                                  | Page |
|---------------------------------------------------------------------------------------------------------------------------|------|
| Figure S1. Current density vs. applied potential curves normalized by the surface area .....                              | S2   |
| Figure S2. EDX spectra of the $\text{AlFe}_2\text{B}_2$ sample subjected to 20 cycles of electrocatalytic activation..... | S2   |

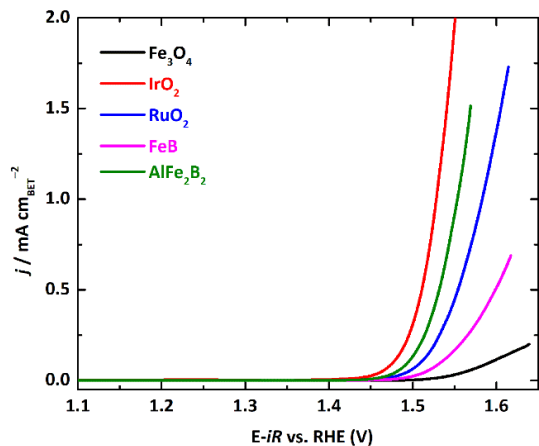

**Figure S1.** Current density vs. applied potential curves measured for different OER electrocatalysts in a 1M KOH electrolyte solution and normalized by the BET surface area of the catalyst.

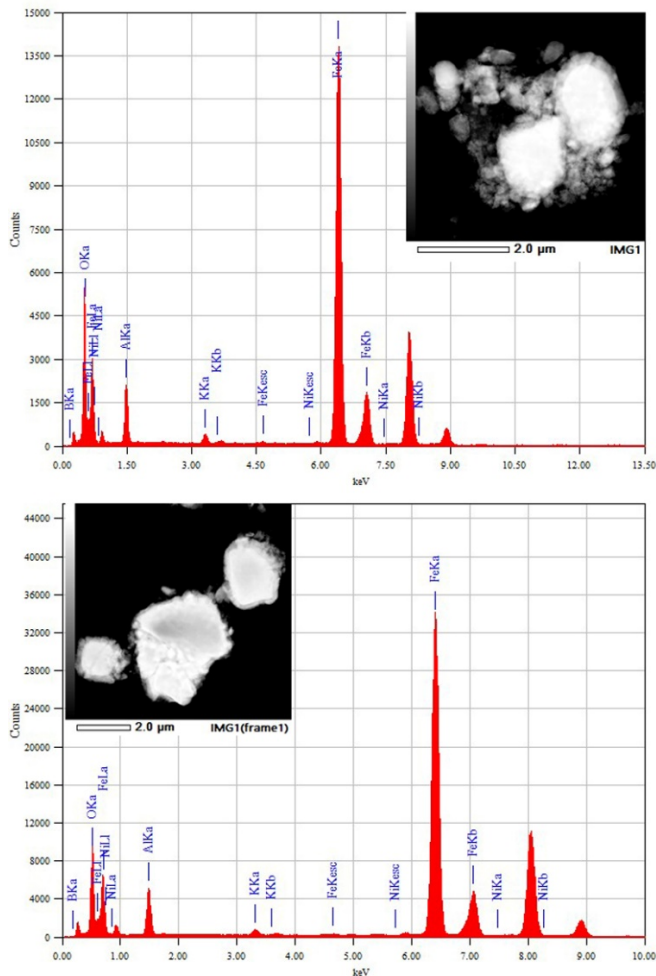

**Figure S2.** EDX spectra of the  $\text{AlFe}_2\text{B}_2$  sample subjected to 20 cycles of electrocatalytic activation in a 1-M KOH electrolyte solution. The absence of any sizeable amount of Ni in the sample is obvious.
